# Supplementary material
Source: MDPI journal article supplement (https://www.mdpi.com/2297-8739/10/3/214)
Supplement: s1 [file s1]

Supporting information to

# Isolation and purification of single gold nanoclusters by alternate pumping chromatography

by Malvina Supper, Virginia Birner, Lukas Gromotka, Wolfgang Peukert, Malte Kaspereit

(submitted to *Separations*)

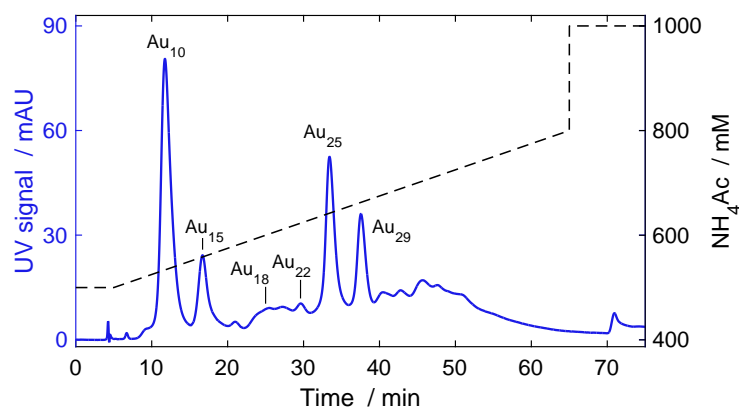

Figure S1: Separation of the feed sample using a shallow ammonium acetate gradient. Injection of  $80\mu\text{L}$  sample with  $1\text{g/L}$ , flow rate  $0.7\text{mL/min}$ .

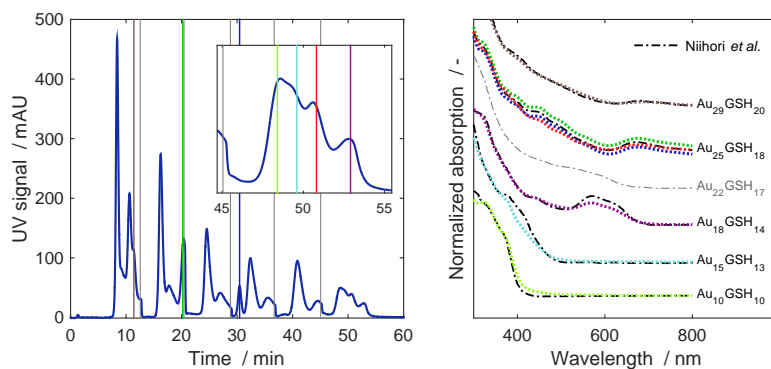

Figure S2: Left – Alternate pumping experiment for the isolation of  $\text{Au}_{10}$  as shown in Fig. 7 of the main manuscript. The inset shows the profile during the last cycle. Right – Identification of individual clusters based on spectra recorded at the time points marked in the left.
